1 **NK cells acquire PD-1 from the membrane of tumor cells.**

2

3 Hasim M.S.<sup>1,2</sup>, Vulpis E.<sup>3</sup>, Sciumè G.<sup>3</sup>, Shih H.Y.<sup>4</sup>, Scheer A.<sup>5</sup>, MacMillan O.<sup>1,2,5</sup>, Petrucci M.T.<sup>6</sup>,

4 Santoni A.<sup>3,7</sup>, Zingoni A.<sup>3</sup>, Ardolino M.<sup>1,2,5</sup>

5

6 1: Cancer Therapeutics Program, Ottawa Hospital Research Institute, Ottawa, ON

7 2: CI3, University of Ottawa, Ottawa, ON

8 3: Department of Molecular Medicine, Sapienza University of Rome, Laboratory affiliated to

9 Istituto Pasteur Italia – Fondazione Cenci-Bolognetti, Rome, Italy

10 4: National Eye Institute, NIH, Bethesda, MD

11 5: Department of Biochemistry, Microbiology and Immunology, University of Ottawa, Ottawa,

12 ON

13 6: Department of Cellular Biotechnology and Hematology, "Sapienza" University of Rome,

14 Rome, Italy

15 7: IRCCS Neuromed, Pozzilli, Italy

16

17 Correspondence:

18 Michele Ardolino

19 501 Smyth Road, Cancer Center, 3-328, Ottawa, ON, K1H 8M2

20 m.ardolino@uottawa.ca

21 Tel: +1-613-737-8899 ext 77257

22 The authors have declared that no conflict of interest exists.

23

24 **Abstract:**

25 NK cells are key effectors of cancer immunosurveillance and immunotherapy and yet, much is  
26 still unknown about how cancer evades NK cell responses. Recent studies showed that checkpoint  
27 receptors, including PD-1, inhibit NK cell functions, but the mechanisms underlying the  
28 expression of these receptors remains unknown. Here, using two mouse models of leukemia, we  
29 show that NK cells, rather than intrinsically expressing the protein, are decorated with exogenous  
30 PD-1 by acquisition of membrane fragments from tumor cells. PD-1 acquisition, both ex vivo and  
31 in vivo, was a feature not only of NK cells, but also of CD8<sup>+</sup> T cells. PD-1 acquisition occurred  
32 with a mechanism consistent with trogocytosis and did not require engagement of PD-1-ligands  
33 on NK cells. In vivo results were corroborated in humans, where PD-1<sup>+</sup> NK cells from multiple  
34 myeloma patients also stained for cancer cell markers. Our results, in addition to shedding light on  
35 a previously unappreciated mechanism underlying the presence of PD-1 on NK and T cells, reveal  
36 the immuno-regulatory effect of membrane transfer occurring when immune cells contact tumor  
37 cells.

38 **Introduction:**

39 NK cells are key effectors of cancer immune-surveillance, and therapeutic strategies to harness  
40 their activity against tumors are emerging as a complementation to T cell-based immunotherapies  
41 (1, 2). To design more effective immunotherapies, a deep understanding of the pathways that  
42 regulate NK cell responses is required. Given the clinical success obtained by immune-checkpoint  
43 blockade immunotherapy (3), much effort was invested to address whether NK cells are inhibited  
44 by checkpoint receptors, and whether NK cells partake in the therapeutic efficacy of checkpoint  
45 blockade. We recently showed that NK cells are suppressed by PD-1 and contribute to the efficacy  
46 of PD-1/L1 blockade in mouse models of cancer (4), and several studies revealed that PD-1 is  
47 found on the surface of human NK cells in cancer patients, including multiple myeloma (MM) and  
48 many solid tumor indications (5-9). Intracellular, but not surface, PD-1 protein was found in resting  
49 human NK cells (10), suggesting that PD-1 can be quickly displayed on the surface of NK cells  
50 upon stimulation. NK cells from mice infected with mouse cytomegalovirus express PD-1 both at  
51 the transcript and at the protein level (11), and a PD-1<sup>high</sup> NK cell population was identified in  
52 human cytomegalovirus-seropositive healthy individuals (12). Therefore, there is now evidence  
53 that NK cells, in different scenarios, express PD-1, but the mechanisms underlying PD-1  
54 expression are still not clear.

55

56 Contrasting these reports, a recent paper convincingly showed that PD-1 is only minimally  
57 expressed, both at the transcript and at the protein level, in NK cells in cancer patients and mouse  
58 models of cancer or viral infection (13). Consistent with that study, we show here that, rather than  
59 relying on endogenous expression, NK cells acquire PD-1 from tumor cells in two mouse models  
60 of leukemia. We also found that in MM patients only NK cells that are positive for tumor cell

61 markers also stained for PD-1, suggesting that PD-1 on NK cells was acquired from MM cells.  
62 Altogether, our data shed light on a new mechanism that could regulate NK cell functions via  
63 acquisition of PD-1 from tumor cells and clarify why PD-1 protein can be detected on intratumoral  
64 NK cells despite the lack of gene expression.

## 65 **Results and Discussion:**

66 When in contact with neighboring cells, lymphocytes often acquire proteins expressed on the  
67 surface of the cells they interact with (14-19). RMA cells, which we extensively used in our last  
68 study to show that PD-1 inhibits NK cell anti-tumor functions (4), derive from transformation of  
69 murine T cells, and express high levels of PD-1 in culture (Fig. 1A). Given that: *i*) NK cells  
70 infiltrating RMA tumors, but not splenic NK cells in the same animals, highly and consistently  
71 stained for PD-1 (4); *ii*) RMA tumors express PD-1 (Fig. 1A); and *iii*) NK cells acquire membrane  
72 fragments from target cells (20), we hypothesized that, rather than endogenously expressing PD-  
73 1, NK cells acquire PD-1 from tumor cells via membrane transfer. To test this hypothesis, we  
74 stably transduced RMA cells with a retroviral vector encoding the syngeneic marker Thy-1.1 (not  
75 expressed by C57BL/6 mice, which express the Thy-1.2 allelic variant) and then generated a  
76 PD-1-deficient RMA line (RMA-*Pdcd1*<sup>-/-</sup>*Thy1.1*) (Fig. 1A). To determine if PD-1 was acquired  
77 by NK cells via membrane transfer, we magnetically isolated splenic NK cells from *Pdcd1*<sup>+/+</sup> or  
78 *Pdcd1*<sup>-/-</sup> mice (purity ~90%) and co-cultured them with either RMA or RMA-*Pdcd1*<sup>-/-</sup>, both  
79 expressing Thy1.1. After 3 days, we analyzed PD-1 and Thy-1.1 staining levels on NK cells by  
80 flow cytometry. In absence of tumor cells, NK cells did not stain for PD-1 or Thy-1.1. In sharp  
81 contrast, NK cells from both *Pdcd1*<sup>+/+</sup> and *Pdcd1*<sup>-/-</sup> mice stained positively for PD-1 when  
82 incubated with RMA cells, but not RMA-*Pdcd1*<sup>-/-</sup> cells (Fig. 1B), whereas Thy-1.1 was abundantly  
83 detected on the surface of NK cells in all conditions (Fig. 1B). These data indicate that NK cells  
84 acquire surface proteins from tumor cells, and that PD-1 is not expressed by NK cells, but rather  
85 acquired from tumor cells in these settings. The antibody used for PD-1 staining, clone 29F.1A12,  
86 proved to bind to nuclear antigens on dying cells resulting in false-positive PD-1 staining (21).  
87 However, we excluded dying cells from our analyses using viability staining and we failed to see

88 any staining in *Pdcd1*<sup>-/-</sup> NK cells incubated with RMA-*Pdcd1*<sup>-/-</sup> tumor cells (Fig. 1B), indicating  
89 the specificity of the detected PD-1 signal.

90

91 Acquisition of PD-1 was not limited to NK cells but was also observed on other immune cells, as  
92 shown in experiments using whole splenocytes. In these conditions, PD-1 and Thy1.1 were not  
93 only acquired by NK cells, but also by CD8<sup>+</sup> T and B cells (Fig. 1C). To complement published  
94 transcriptomic data revealing limited *Pdcd1* mRNA expression (13) and our flow-cytometric  
95 analysis showing high abundance of PD-1 protein on NK cells, we analyzed the *Pdcd1* locus in T  
96 cells and NK cells using a published dataset (22). ATAC-seq analysis revealed that the promoter  
97 region of the *Pdcd1* locus was not accessible in splenic NK cells, in contrast to the promoter region  
98 of the *Tigit* locus which was accessible on both NK cells and CD8<sup>+</sup> T cells (Fig. 1D).

99

100 Acquisition of PD-1 by NK cells was not limited to NK-RMA interactions. C1498 cells, often used  
101 as a leukemia model, derive from transformation of murine NKT cells (23). A fraction of C1498  
102 cells (~5%) expressed PD-1 in culture (Fig. 1E). We sorted PD-1<sup>+</sup>C1498 cells, confirmed that they  
103 stably expressed PD-1 upon 2 weeks in culture (Fig. 1F), and then incubated them for one or three  
104 days with *Pdcd1*<sup>-/-</sup> NK cells. After 24 hrs, only NK cells incubated with C1498-PD-1<sup>+</sup> cells stained  
105 positively for PD-1 (Fig. 1G). PD-1 staining was further increased after 3 days of incubation, when  
106 we also observed a modest shift in NK cells incubated with C1498 parental cells (Fig. 1G),  
107 suggesting that PD-1 acquisition on NK cells depended on the level of expression on the donor  
108 cells and increased over time.

109

110 Given that NK cells acquired proteins expressed by the hematopoietic cell lines RMA and C1498,  
111 we next investigated if the same phenomenon could be observed with non-hematopoietic tumors.  
112 We transduced 4T1, CT26 and TRAMP-C2, all of non-hematopoietic origin, with a *Thy1.1*  
113 encoding vector, sorted the Thy-1.1<sup>+</sup> population, and co-cultured them with purified splenic NK  
114 cells for 3 days. As expected, Thy-1.1 decorated the surface of NK cells incubated not only with  
115 RMA cells, but also with tumor cells of non-hematopoietic origin (Fig. 1H), confirming that NK  
116 cells broadly acquire proteins from the surface of tumor cells they interact with. Expression of  
117 PD-1 in non-hematopoietic cell lines was not observed, therefore we could not investigate if PD-1  
118 was transferred to NK cells in these settings.

119

120 To better understand the nature of protein transfer from tumor to NK cells, we ran kinetic  
121 experiments where splenic NK cells isolated from *Pdcd1*<sup>-/-</sup> mice were incubated with RMA cells  
122 for 2, 8, 24 or 48 hrs, before analyzing PD-1 staining on NK cells. NK cells acquired PD-1 as early  
123 as 2 hrs, and both the percentage of PD-1<sup>+</sup> NK cells and the magnitude of PD-1 acquisition  
124 increased over time (Fig. 2A), corroborating what observed using C1498 cells (Fig. 1G). Since  
125 NK cells acquired PD-1 as early as 2 hrs, we repeated the co-culture including earlier time points.  
126 NK cells acquired PD-1 as early as 15 minutes after co-culture with RMA cells was initiated (Fig.  
127 2B), confirming previous reports showing that a few minutes of interactions are sufficient for NK  
128 cells to acquire proteins from neighboring cells (14).

129

130 Transwell experiments, where NK and RMA cells were co-cultured for 24 hrs separated by a  
131 semi-permeable membrane, revealed that cell-cell contact was required for NK cells to acquire  
132 PD-1 from tumor cells (Fig. 2C), excluding a role for soluble or exosomal PD-1 in the acquisition



133 of PD-1 on NK cells. Rapid cell contact-dependent acquisition of proteins from NK cells to target  
134 cells is consistent with trogocytosis, i.e. the acquisition of membrane fragments often performed  
135 by immune cells (20). Corroborating this hypothesis, PD-1 transfer was accompanied by  
136 acquisition of lipids from tumor cells, as revealed by experiments where NK cells were co-cultured  
137 with RMA cells previously labelled with Cell-Vue, a dye that intercalates in the lipid regions of  
138 the cellular membrane. Not only NK cells became robustly positive for the dye, but also PD-1  
139 staining was more abundantly detected on NK cells that also acquired Cell-Vue (Fig. 2D). These  
140 experiments indicate that PD-1 is acquired contextually with transfer of whole membrane  
141 fragments from tumor to NK cells. Acquisition of proteins from donor cells can be facilitated via  
142 receptor-ligand engagement, a phenomenon known as trans-endocytosis, which NK cells are  
143 known to mediate (19). In culture, NK cells fail to express PD-L2 but express PD-L1 (Fig. 2E and  
144 (24)), which could therefore serve as a ligand for trans-endocytosis-driven acquisition of PD-1  
145 from RMA cells. However, when we co-cultured NK cells and RMA cells in the presence of a  
146 saturating dose of PD-L1 blocking antibody, PD-1 acquisition was not reduced (Fig. 2F-G) as we  
147 would expect if trans-endocytosis was involved. These data suggest that PD-1 trogocytosis does  
148 not rely on engagement of PD-L1 expressed on NK cells.

149

150 As we showed that PD-1 is abundantly present in NK cells infiltrating RMA tumors (4), and in  
151 light of our discovery that NK cells acquire PD-1 from RMA cells ex vivo, we performed in vivo  
152 studies to determine if intratumoral NK cells acquired PD-1 from cancer cells. We injected  
153 *Pdcd1*<sup>+/+</sup> or *Pdcd1*<sup>-/-</sup> mice with RMA or RMA-*Pdcd1*<sup>-/-</sup>, both expressing Thy-1.1, and when tumors  
154 reached ~300 mm<sup>3</sup> we analyzed intratumoral NK cells. In all cohorts of mice, NK cells infiltrating  
155 the tumors highly stained for Thy-1.1 (Fig. 3A-D, Y axis), showing that membrane-transfer

156 occurred in vivo. Strikingly, high levels of PD-1 were detected on the surface of NK cells only  
157 when tumor cells expressed PD-1, not only in *Pdcd1*<sup>+/+</sup>, but also in *Pdcd1*<sup>-/-</sup> mice (Fig. 3A and C  
158 vs B and D). These data not only show that PD-1 is acquired by tumor infiltrating NK cells, but  
159 also that membrane-transfer is the major mechanism leading to PD-1 presence on the surface of  
160 NK cells in the RMA model. Consistent with what was observed on NK cells, CD8<sup>+</sup> T cells from  
161 *Pdcd1*<sup>-/-</sup> mice also acquired Thy-1.1 and PD-1 from tumor cells (Fig. 3C), but, as expected, PD-1  
162 staining in CD8<sup>+</sup> T cells was also observed in *Pdcd1*<sup>+/+</sup> mice injected with PD-1-deficient RMA  
163 cells, confirming that CD8<sup>+</sup> T cells endogenously expressed PD-1. In our previous study, we  
164 reported that PD-1 staining was higher on activated NK cells (4). Analysis of NK and T cells from  
165 *Pdcd1*<sup>-/-</sup> mice infiltrating RMA tumors confirmed that PD-1<sup>+</sup> NK and T cells also stained more  
166 brightly for activation markers such as Sca-1 and CD69 (Fig. 3E). These data show that both T  
167 and NK cells acquire fragments of tumor cell membranes in vivo, and that acquisition is higher in  
168 activated lymphocytes.

169  
170 Finally, to determine if NK cells acquire PD-1 from tumor cells in cancer patients, we analyzed  
171 PD-1 staining in NK cells in MM patients, where PD-1 expression in NK cells was originally  
172 reported (5). Three out of five patients analyzed had a sizeable (>1%) population of blasts in the  
173 bone marrow (BM), whereas in two patients we failed to detect tumor cells. Interestingly, only in  
174 the three patients with BM blasts (P1, P2, P3), we found a population of NK cells that stained  
175 positive for CD138 (Fig. 4A), a protein that is expressed by MM but not NK cells. The blasts  
176 presented heterogeneous expression of PD-1, which was abundant on all tumor cells (in P1), or  
177 expressed bimodally by tumor cells (a small fraction - ~5%- in P2 or a larger fraction - ~55%- in  
178 P3) (Fig. 4B). Strikingly, in the two patients where PD-1 was mostly expressed on the tumor cells,

179 NK cells that stained for CD138 also stained highly for PD-1, at the same levels as tumor cells  
180 (Fig. 4B in green), whereas CD138-negative NK cells were PD-1 negative, as were NK cells in  
181 the peripheral blood, where no blasts were found (Fig. 4B, in blue and red, respectively).  
182 Moreover, the patient with poor PD-1 expression on tumor cells also showed lower PD-1 staining  
183 on CD138<sup>+</sup> NK cells in the BM (Fig. 4B, P2). Therefore, these data are consistent with the idea  
184 that NK cells in MM patients acquire PD-1 and cancer cell markers from tumor cells.

185  
186 In conclusions, this study highlights a new mechanism by PD-1 localizes on the surface not only  
187 of NK cells, but also of T cells. We propose that acquisition of PD-1 by membrane transfer is a  
188 previously unappreciated immune-modulatory mechanism employed by tumor cells to evade  
189 immuno-surveillance. In light of these results, it will be important for future immune-profiling  
190 efforts based on transcriptomic analysis to take into account that proteins are acquired, sometimes  
191 at surprisingly high levels, by immune cells in the tumor microenvironment. While our study has  
192 exclusively focused on tumors of hematopoietic origin, PD-1 acquisition is likely to occur in solid  
193 malignancies as well, where NK cells and T cells constantly interact with other immune cells,  
194 some of which express PD-1. Finally, pursuant to our previous studies and given its known  
195 importance in suppressing anti-cancer responses we focused on PD-1, it is conceivable that other  
196 proteins with immunomodulatory potential will be acquired by NK and T cells while interacting  
197 with tumor cells. Characterization of the mechanisms underlying membrane transfer and  
198 identification of molecules transferred to immune cells is required to elucidate how immune cells  
199 are regulated by checkpoint receptors, and other proteins, in a transcription-independent fashion.

200 **Acknowledgment:**

201 We thank members of the Ardolino lab, Drs. Vanderhyden, Gray, Scott, Horan,  
 202 Bourgeois-Daigneault and Kissov for critically reading the manuscript; Fernando Ortiz, Drs. Tang,  
 203 Stanford, Ito and the CHEO flow-core for support with flow-cytometry; the ACVS facility at the  
 204 University of Ottawa for support with animal studies. MA is supported by Ride for Dad and CIHR,  
 205 HYS by the NIH intramural research programs, GS and AS by AIRC and AZ by “Sapienza  
 206 University”. EV is supported by an AIRC fellowship.

207

208 **Author contributions.**

209 Author contributions are detailed according to CRediT criteria.

| Author   | Conceptualization | Formal analysis | Funding acquisition | Investigation | Methodology | Resources | Supervision | Visualization | Writing - original draft | Writing review - & editing |
|----------|-------------------|-----------------|---------------------|---------------|-------------|-----------|-------------|---------------|--------------------------|----------------------------|
| Hasim    | X                 |                 |                     | X             | X           |           |             |               |                          | X                          |
| Vulpis   |                   |                 |                     | X             |             |           |             |               | X                        | X                          |
| Sciumè   | X                 | X               | X                   |               |             |           | X           |               |                          | X                          |
| Shih     | X                 | X               | X                   |               |             |           |             | X             |                          | X                          |
| Scheer   |                   |                 |                     | X             |             |           |             |               |                          | X                          |
| McMillan |                   |                 |                     | X             |             |           |             |               |                          | X                          |
| Petrucci |                   |                 |                     |               |             | X         |             |               |                          |                            |
| Santoni  |                   |                 | X                   |               |             | X         | X           |               |                          | X                          |
| Zingoni  | X                 |                 | X                   |               |             | X         | X           |               |                          | X                          |
| Ardolino | X                 | X               | X                   | X             | X           |           | X           | X             | X                        | X                          |

210

## 211 References:

- 212 1. Hodgins JJ, Khan ST, Park MM, Auer RC, and Ardolino M. Killers 2.0: NK cell therapies at  
213 the forefront of cancer control. *J Clin Invest.* 2019;129(9):3499-510.
- 214 2. Miller JS, and Lanier LL. Natural Killer Cells in Cancer Immunotherapy. *Annual Review of*  
215 *Cancer Biology.* 2019;3(1):77-103.
- 216 3. Baumeister SH, Freeman GJ, Dranoff G, and Sharpe AH. Coinhibitory Pathways in  
217 Immunotherapy for Cancer. *Annu Rev Immunol.* 2016;34:539-73.
- 218 4. Hsu J, Hodgins JJ, Marathe M, Nicolai CJ, Bourgeois-Daigneault MC, Trevino TN, et al.  
219 Contribution of NK cells to immunotherapy mediated by PD-1/PD-L1 blockade. *J Clin*  
220 *Invest.* 2018;128(10):4654-68.
- 221 5. Benson DM, Bakan CE, Mishra A, Hofmeister CC, Efebera Y, Becknell B, et al. The PD-1/PD-  
222 L1 axis modulates the natural killer cell versus multiple myeloma effect: a therapeutic  
223 target for CT-011, a novel monoclonal anti-PD-1 antibody. *Blood.* 2010;116(13):2286-94.
- 224 6. Beldi-Ferchiou A, Lambert M, Dogniaux S, Vély F, Vivier E, Olive D, et al. PD-1 mediates  
225 functional exhaustion of activated NK cells in patients with Kaposi sarcoma. *Oncotarget.*  
226 2016;7(45):72961-77.
- 227 7. Liu Y, Cheng Y, Xu Y, Wang Z, Du X, Li C, et al. Increased expression of programmed cell  
228 death protein 1 on NK cells inhibits NK-cell-mediated anti-tumor function and indicates  
229 poor prognosis in digestive cancers. *Oncogene.* 2017;36(44):6143-53.
- 230 8. Vari F, Arpon D, Keane C, Hertzberg MS, Talaulikar D, Jain S, et al. Immune evasion via PD-  
231 1/PD-L1 on NK cells and monocyte/macrophages is more prominent in Hodgkin  
232 lymphoma than DLBCL. *Blood.* 2018;131(16):1809-19.
- 233 9. Quatrini L, Vacca P, Tumino N, Besi F, Di Pace AL, Scordamaglia F, et al. Glucocorticoids  
234 and the cytokines IL-12, IL-15 and IL-18 present in the tumor microenvironment induce  
235 PD-1 expression on human Natural Killer cells. *J Allergy Clin Immunol.* 2020.
- 236 10. Mariotti FR, Petrini S, Ingegnere T, Tumino N, Besi F, Scordamaglia F, et al. PD-1 in human  
237 NK cells: evidence of cytoplasmic mRNA and protein expression. *Oncoimmunology.*  
238 2019;8(3):1557030.
- 239 11. Quatrini L, Wieduwild E, Escaliere B, Filtjens J, Chasson L, Laprie C, et al. Endogenous  
240 glucocorticoids control host resistance to viral infection through the tissue-specific  
241 regulation of PD-1 expression on NK cells. *Nat Immunol.* 2018;19(9):954-62.
- 242 12. Pesce S, Greppi M, Tabellini G, Rampinelli F, Parolini S, Olive D, et al. Identification of a  
243 subset of human natural killer cells expressing high levels of programmed death 1:  
244 A phenotypic and functional characterization. *J Allergy Clin Immunol.* 2017;139(1):335-  
245 46.e3.
- 246 13. Judge SJ, Dunai C, Aguilar EG, Vick SC, Sturgill IR, Khuat LT, et al. Minimal PD-1 expression  
247 in mouse and human NK cells under diverse conditions. *J Clin Invest.* 2020.
- 248 14. Carlin LM, Eleme K, McCann FE, and Davis DM. Intercellular transfer and supramolecular  
249 organization of human leukocyte antigen C at inhibitory natural killer cell immune  
250 synapses (vol 194, pg 1507, 2001). *Journal of Experimental Medicine.* 2001;194(12):1883.
- 251 15. Sjostrom A, Eriksson M, Cerboni C, Johansson MH, Sentman CL, Karre K, et al. Acquisition  
252 of external major histocompatibility complex class I molecules by natural killer cells  
253 expressing inhibitory Ly49 receptors. *J Exp Med.* 2001;194(10):1519-30.

- 254 16. Tabiasco J, Espinosa E, Hudrisier D, Joly E, Fournie JJ, and Vercellone A. Active trans-  
255 synaptic capture of membrane fragments by natural killer cells. *Eur J Immunol.*  
256 2002;32(5):1502-8.
- 257 17. Tabiasco J, Vercellone A, Meggetto F, Hudrisier D, Brousset P, and Fournie JJ. Acquisition  
258 of viral receptor by NK cells through immunological synapse. *J Immunol.*  
259 2003;170(12):5993-8.
- 260 18. Hudrisier D, and Joly E. What is trogocytosis and what is its purpose? *Nat Immunol.*  
261 2003;4(9):815.
- 262 19. Anton OM, Peterson ME, Hollander MJ, Dorward DW, Arora G, Traba J, et al. Trans-  
263 endocytosis of intact IL-15Ralpha-IL-15 complex from presenting cells into NK cells favors  
264 signaling for proliferation. *Proc Natl Acad Sci U S A.* 2020;117(1):522-31.
- 265 20. Bettadapur A, Miller HW, and Ralston KS. Biting off what can be chewed: Trogocytosis in  
266 health, infection and disease. *Infect Immun.* 2020.
- 267 21. Metzger P, Kirchleitner SV, Koenig LM, Horth C, Kobold S, Endres S, et al. Dying cells  
268 expose a nuclear antigen cross-reacting with anti-PD-1 monoclonal antibodies. *Sci Rep.*  
269 2018;8(1):8810.
- 270 22. Shih HY, Sciume G, Mikami Y, Guo L, Sun HW, Brooks SR, et al. Developmental Acquisition  
271 of Regulomes Underlies Innate Lymphoid Cell Functionality. *Cell.* 2016;165(5):1120-33.
- 272 23. LaBelle JL, and Truitt RL. Characterization of a murine NKT cell tumor previously described  
273 as an acute myelogenous leukemia. *Leuk Lymphoma.* 2002;43(8):1637-44.
- 274 24. Dong W, Wu X, Ma S, Wang Y, Nalin AP, Zhu Z, et al. The Mechanism of Anti-PD-L1  
275 Antibody Efficacy against PD-L1-Negative Tumors Identifies NK Cells Expressing PD-L1 as  
276 a Cytolytic Effector. *Cancer discovery.* 2019;9(10):1422-37.
- 277
- 278

279 **Methods.**

280 **Mice and in vivo procedures.**

281 Mice were maintained at the University of Ottawa. *Pdcd1* knockout mice  
282 (B6.Cg-Pdcd1tm1.1Shr/J) were purchased from The Jackson Laboratory and crossed with  
283 C57BL/6J mice purchased from The Jackson Laboratory to obtain *Pdcd1* heterozygous mice.  
284 Heterozygous mice were bred to obtain *Pdcd1*<sup>+/+</sup> and *Pdcd1*<sup>-/-</sup> littermates, which were used in all  
285 experiments. For all experiments, sex-matched (both males and females) and age-matched (7 to  
286 18 weeks old) mice were used.

287

288 For subcutaneous injections, tumor cells were resuspended in 100 µl PBS and injected in the left  
289 flank. Tumors were collected when tumor volume was approximately 300 mm<sup>3</sup>.

290

291 **Cell lines.**

292 All cell lines were cultured at 37°C in a humidified atmosphere containing 5% CO<sub>2</sub>. RMA-Thy1.1,  
293 RMA-Thy1.1-*Pdcd1*<sup>-/-</sup> and C1498 cells were maintained in RPMI culture medium containing 100  
294 U/ml penicillin, 100 µg/ml streptomycin, 0.2 mg/ml glutamine, 10 µg/ml gentamycin sulfate, 20  
295 mM HEPES, and 5% FCS. 4T1, CT26, and TRAMP-C2 cell lines were cultured in DMEM  
296 complemented with the same reagents. Cell line identity was confirmed by flow cytometry when  
297 possible, and cells were regularly tested for mycoplasma.

298

299 **Ex vivo co-culture experiments.**

300 Murine splenic NK cells were isolated using the EasySep™ Mouse NK Cell Isolation Kit  
301 (StemCell Technologies). In all experiments with isolated NK cells, 1000 U/mL rhIL-2 (NIH BRB

302 Preclinical Repository) was added to the culture medium. For co-culture experiments NK cells  
303 were labelled with Cell Trace Violet proliferation dye (BD Bioscience) and tumor cells with CFSE  
304 (Biolegend), unless otherwise indicated. 100,000 NK cells were co-cultured with tumor cells at a  
305 1:1 ratio in 24 well plates in a final volume of 1 mL.

306

307 For transwell experiments (0.4  $\mu\text{m}$  filter, Millipore), co-culture was set up in 6-well plates with a  
308 final volume of 3 mL.

309

310 For membrane dye transfer experiments, NK cells were labelled with CFSE and RMA cells with  
311 CellVue Claret FarRed (Sigma-Aldrich). 10,000 NK cells were then co-cultured with RMA cells  
312 at a 1:10 ratio in 96-well V-bottom plates with a final volume of 100  $\mu\text{L}$ .

313

314 In the kinetics experiments, NK cells were incubated with RMA cells and an aliquot of cells was  
315 removed and fixed with BD Cytofix/perm at the indicated time points. Fixed cells were left at 4°C  
316 until all time points were collected. All samples were stained together with the same antibody mix.

317

318 In experiments where PD-L1 was blocked, 5  $\mu\text{g}$  of PD-L1 blocking antibody clone 10F.9G2 (or  
319 isotype control) was added to the co-culture.

320

321 When whole spleens were used, 200,000 splenocytes were co-cultured with tumor cells at a 2:1  
322 ratio in 6 well plates, in a final volume of 3 mL.

323

324 **Flow cytometry.**



325 When needed, tumors were excised from mice, cut in pieces, resuspended in serum-free media,  
326 and dissociated using a gentle MACS dissociator (Miltenyi). Following dissociation, the single  
327 cell suspension was passed through a 40  $\mu$ m filter and cells were washed and resuspended in PBS  
328 for staining. Spleens were harvested, gently dissociated through a 40  $\mu$ m filter, washed, and red  
329 blood cells were lysed using ACK buffer (Sigma), then washed and resuspended in PBS for  
330 staining.

331

332 The cellular preparation was stained with the Zombie NIR Fixable Viability Dye (BioLegend) for  
333 20 mins in PBS to label dead cells. Cells were then washed with flow buffer (PBS + 0.5% BSA)  
334 and incubated for 20 minutes with purified rat anti-mouse CD16/CD32 (Clone 2.4G2) (BD  
335 Biosciences) to block Fc $\gamma$ RII/III receptors, followed by washing in flow buffer, and then incubated  
336 for a further 20 minutes with primary specific antibodies. Cells were washed and resuspended in  
337 flow buffer for sample acquisition or fixed in BD Cytofix/Cytoperm and acquired within 7 days.  
338 Flow cytometry was performed using an LSRFortessa (BD) or a Celesta (BD), and data were  
339 analyzed with FlowJo software (Tree Star Inc.)

340

#### 341 **Antibodies.**

342 For experiments with murine cells, the following antibodies were used: *i*) from BD Biosciences:  
343 anti-CD3 $\epsilon$  (clone 145-2C11); anti-CD8a (clone 53-6.7); anti-CD11b (clone M1/70); anti-CD11c  
344 (clone HL3); anti-CD49b (clone DX5); anti-CD69 (clone H1.2F3); anti-Ly6G (clone 1A8);  
345 anti-NK1.1 (clone PK136); anti-Sca-1 (clone D7); *ii*) from Biolegend: anti-CD4 (clone RM4-5);  
346 anti-CD19 (clone 6D5); anti-Thy-1.1 (clone OX-7); anti-F4/80 (clone BM8); anti-Ly6c (clone

347 HK1.4); anti-NKp46 (clone 29A1.4); anti-PD-1 (clone 29F.1A12); anti-PD-L1 (clone 10F.9G2);  
348 rat IgG2a isotype control; and mouse-IgG1 isotype control.

349

350 For experiments with MM patients, the following antibodies were used: anti-CD138 (clone MI15),  
351 anti-CD38 (clone HIT2), anti-CD3 (clone SK7), anti-CD56 (clone NCAM16.2), anti CD45 (clone  
352 HI30), anti-CD16 (clone 3G8) and anti-PD1 (clone EH12.1), all from BD Biosciences

353

#### 354 **Generation of cell line variants.**

355 RMA, 4T1, CT26 and TRAMP-C2 cells were transduced with the retroviral expression vector  
356 MSCV-IRES-Thy1.1-DEST (Addgene, 17442), by spin infection (800 x g for 2 hours at 37°C)  
357 with 8 µg/ml polybrene, and Thy1.1+ RMA cells were sorted.

358

359 Single-guide RNA (sgRNA) targeting the first exon of the *Pdcd1* gene (sequence:  
360 TGTGGGTCCGGCAGGTACCC) was cloned into the LentiCRISPR lentiviral backbone vector  
361 (Addgene 52961), also containing the *Cas9* gene. Lentiviral expression vectors were generated by  
362 transfecting 293T cells with 2 µg vector with 2 µg packaging plus polymerase-encoding plasmids  
363 using Lipofectamine 2000. Virus-containing supernatants were used to transduce RMA-*Thy1.1*  
364 cells by spin infection and PD-1 negative cells were sorted.

365

366 C1498-PD-1+ cells were obtained by sorting PD-1+ C1498 parental cells.

367

368 All engineered cells were regularly assessed for phenotype maintenance by flow cytometry.

369

370 **ATAC-seq.**

371 Genomic snapshots were generated using IGV software (Broad Institute) using data available on  
372 GEO: GSE77695.

373

374 **Analysis of multiple myeloma patients.**

375 Peripheral blood and BM were obtained from MM patients enrolled at the Division of Hematology  
376 (“Sapienza” University of Rome). Both peripheral blood and BM samples were lysed using a  
377 buffer composed of 1.5 M NH<sub>4</sub>Cl, 100 mM NaHCO<sub>3</sub>, and 10 mM EDTA and then stained as  
378 described above.

379

380 **Study approvals.**

381 Mouse studies were reviewed and approved by Animal Care Veterinary Services at the University  
382 of Ottawa in accordance with the guidelines of Canadian Institutes of Health Research. For human  
383 studies, informed and written consent in accordance with the Declaration of Helsinki was obtained  
384 from all patients, and approval was obtained from the Ethics Committee of the Sapienza University  
385 of Rome (RIF.CE: 5191).

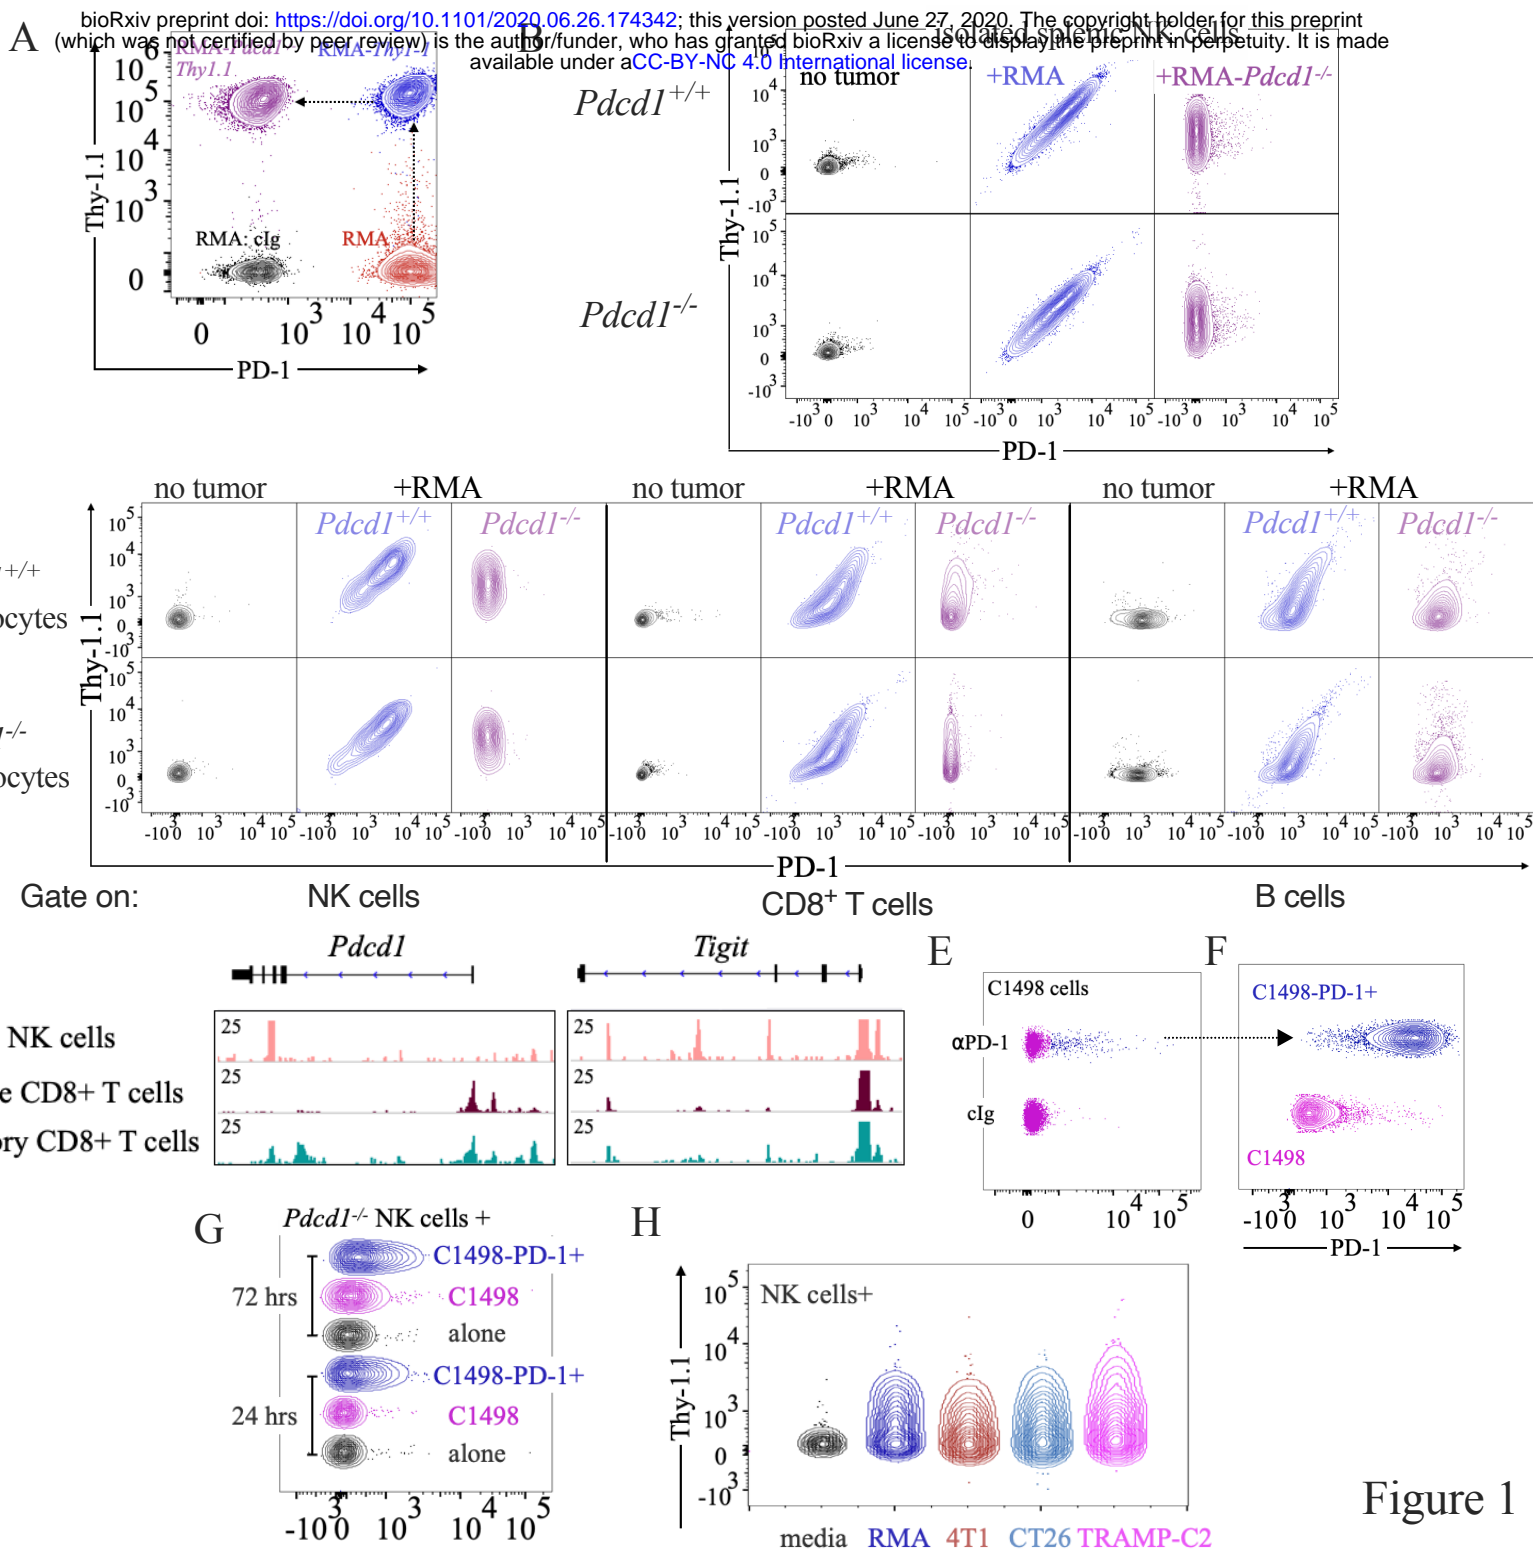

Figure 1

**Figure 1: NK cells acquire PD-1 from cancer cells.** (A) RMA cells (red) were transduced with a retroviral vector encoding Thy-1.1 to generate RMA-*Thy1.1* (blue) and then PD-1 was knocked-out by CRISPR/Cas9 to generate RMA-*Pcd1*<sup>-/-</sup>*Thy1.1* (pink). A representative flow-cytometry staining depicting PD-1 and Thy-1.1 expression is shown. (B) NK cells isolated from *Pcd1*<sup>+/+</sup> or *Pcd1*<sup>-/-</sup> littermates were incubated with RMA-*Thy1.1* or RMA-*Pcd1*<sup>-/-</sup>*Thy1.1*. After 3 days, cells were stained with Thy1.1 and PD-1 antibodies. NK cells were gated as singlets/live-NK1.1<sup>+</sup>NKp46<sup>+</sup>DX5<sup>+</sup> events. The experiment depicted is representative of three performed with similar results. (C) Splenocytes from *Pcd1*<sup>+/+</sup> or *Pcd1*<sup>-/-</sup> littermates were incubated with RMA-*Thy1.1* or RMA-*Pcd1*<sup>-/-</sup>*Thy1.1*. After 3 days, cells were stained with Thy1.1 and PD-1 antibodies. CD8<sup>+</sup> T cells were gated as singlets/live-CD3<sup>+</sup>CD8<sup>+</sup> events, B cells as singlets/live-CD19<sup>+</sup>. The experiment depicted is representative of two three performed with similar results. (D) Genomic snapshots of normalized ATAC-seq signals in NK cells, naïve and memory CD8<sup>+</sup> T cells across *Pcd1* and *Tigit* loci. (E) C1498 cells were stained with PD-1 antibody or isotype control. PD-1<sup>+</sup> cells (in blue) were flow-sorted and after 2 weeks in culture stained for PD-1, alongside with parental C1498 cells (F). (G) Splenic NK cells isolated from *Pcd1*<sup>-/-</sup> mice were co-cultured with C1498 or C1498-PD-1<sup>+</sup> cells, or without tumor cells as a control, for 24 hrs or 72 hrs, and stained for PD-1. The experiment depicted is representative of three performed with similar results. (H) Splenic NK cells isolated from *Pcd1*<sup>-/-</sup> mice were co-cultured with RMA, 4T1, CT26 or TRAMP-C2 cells, previously transduced and sorted to stably express Thy-1.1. Thy-1.1 staining was analyzed after 3 days by flow-cytometry. In all panels, NK cells were gated as described in 1B.

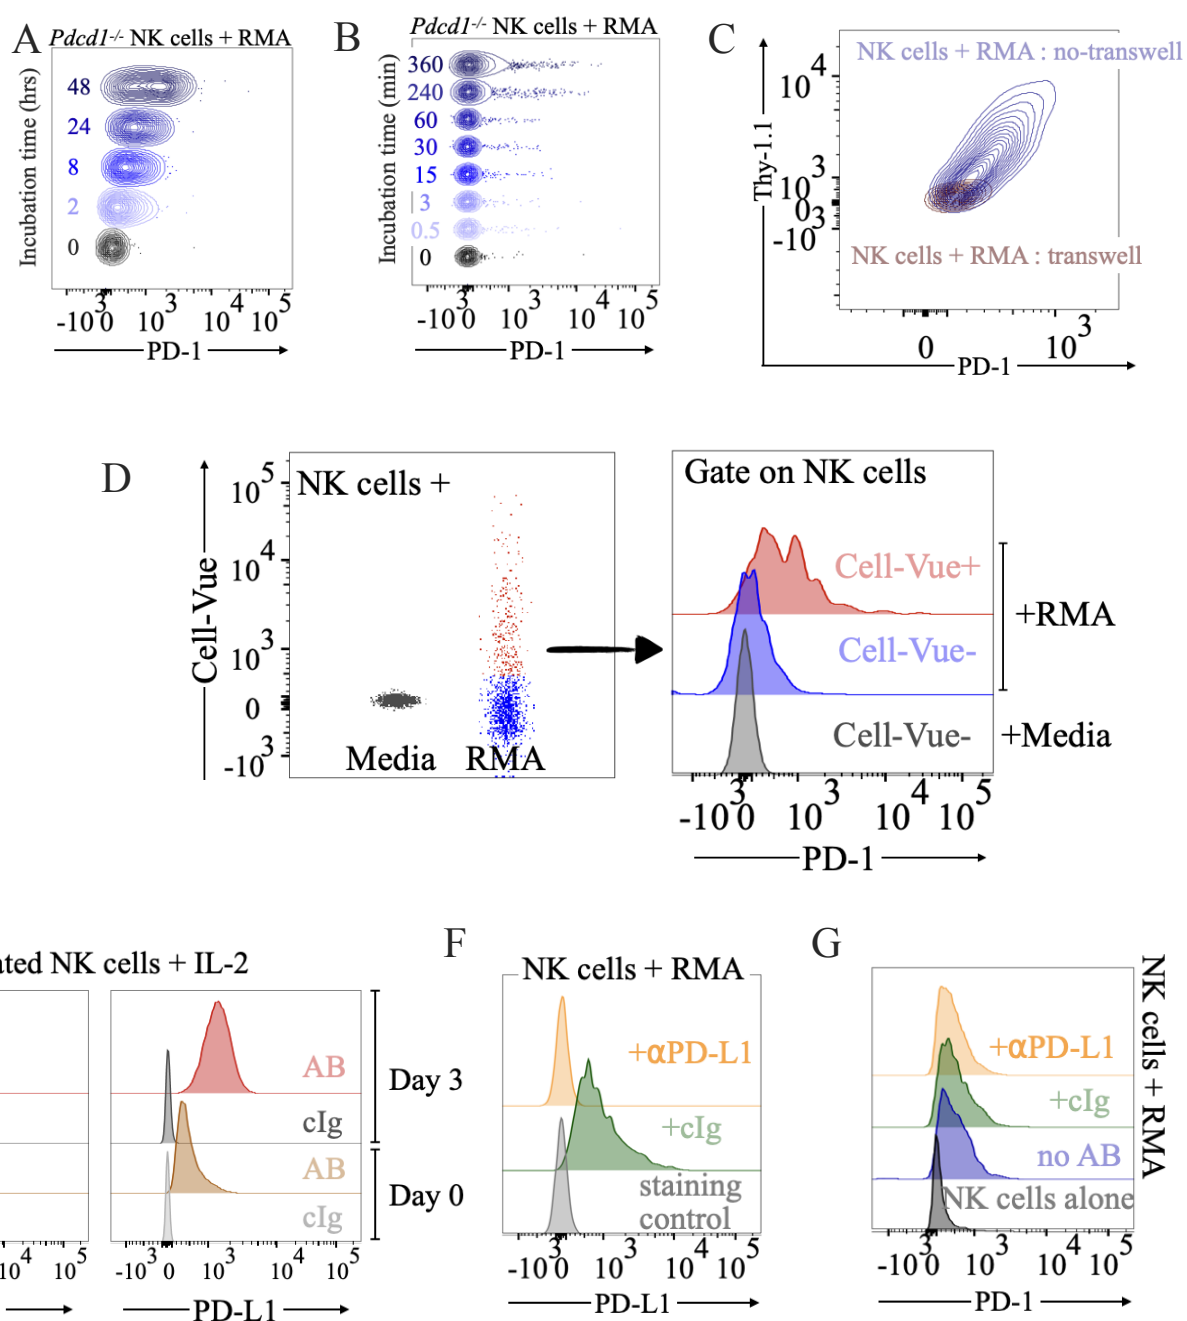

Figure 2

**Figure 2. NK cells acquire PD-1 via trogocytosis.** Splenic NK cells isolated from a *Pdcd1*<sup>-/-</sup> mouse were co-cultured with RMA cells for 2, 8, 24 or 48 hrs (A) or 0.5, 3, 15, 30, 60, 240, 360 mins (B) before staining for PD-1. (C) Splenic NK cells isolated from a *Pdcd1*<sup>-/-</sup> mouse were co-cultured for 24 hrs with RMA cells separated or not by a transwell semi-permeable membrane before staining for PD-1 and Thy-1.1. The experiment depicted is representative of two performed with similar results. (D) NK cells were incubated with RMA cells pre-labelled with Cell-Vue for 24 hrs. Cell-Vue and PD-1 staining on NK cells is depicted, on the left and right respectively. (E) Splenic NK cells isolated from a *Pdcd1*<sup>-/-</sup> mouse were cultured for 3 days and then PD-L2 and PD-L1 expression was analyzed by flow-cytometry. Representative of three experiments performed with similar results. (F-G) NK cells were incubated with RMA cells in the presence of a PD-L1 blocking antibody or an isotype control for 24 hrs, before being stained for PD-1 and PD-L1. As additional controls, NK cells were: *i*) co-cultured with RMA without adding any antibody; or *ii*) cultured alone without adding tumor cells. In all panels, NK cells were gated as in 1B.

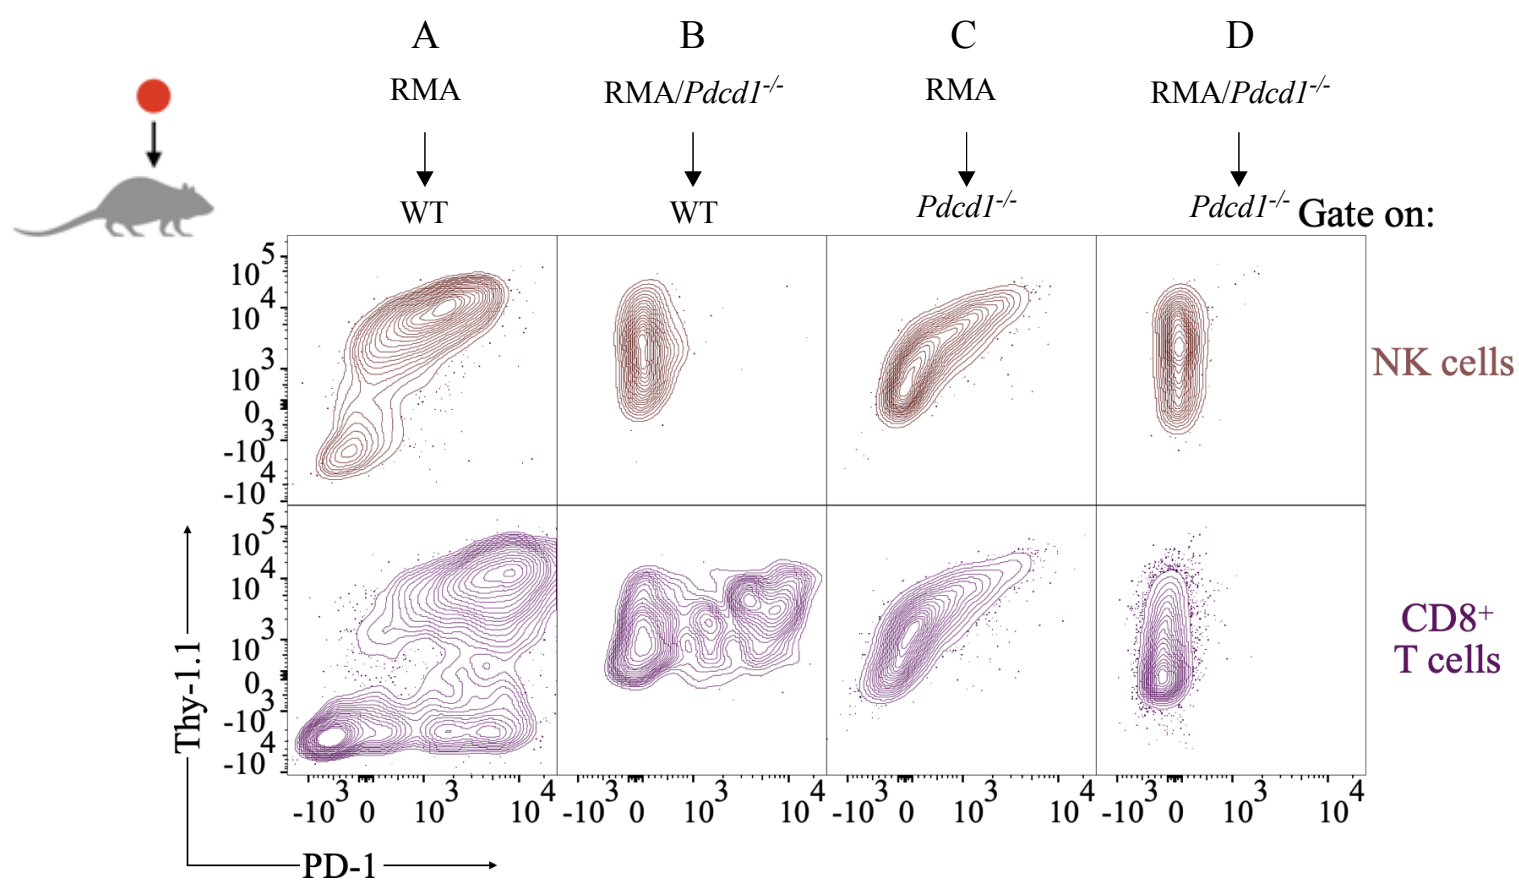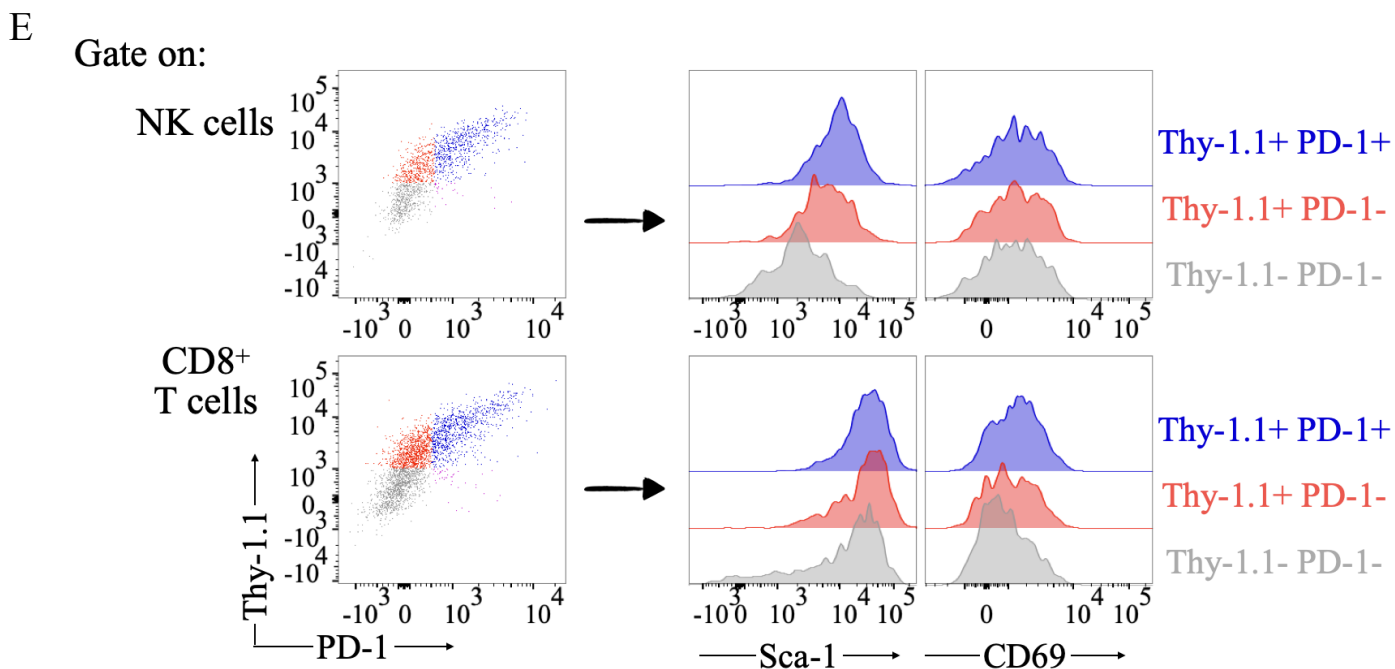

Figure 3

**Figure 3: Intratumoral NK and T cells acquire PD-1 from tumor cells.** (A-D) *Pdcd1*<sup>+/+</sup> or *Pdcd1*<sup>-/-</sup> mice were injected with RMA or RMA-*Pdcd1*<sup>-/-</sup> tumors. PD-1 and Thy-1.1 staining was assessed by flow-cytometry on tumor infiltrating NK and T cells (gated as in Fig. 1B and 1C, respectively). Expression of Sca1 and CD69 was analyzed on *Pdcd1*<sup>-/-</sup> NK and T cells infiltrating RMA tumors, by gating on Thy-1.1<sup>-</sup>PD-1<sup>-</sup> (gray), Thy-1.1<sup>+</sup>PD-1<sup>-</sup> (red) or Thy-1.1<sup>+</sup>PD-1<sup>+</sup> (blue) cells. The mouse depicted in 4E is the same depicted in 4C. The experiment shown is representative of two performed with similar results. At least 4 mice/group were analyzed.

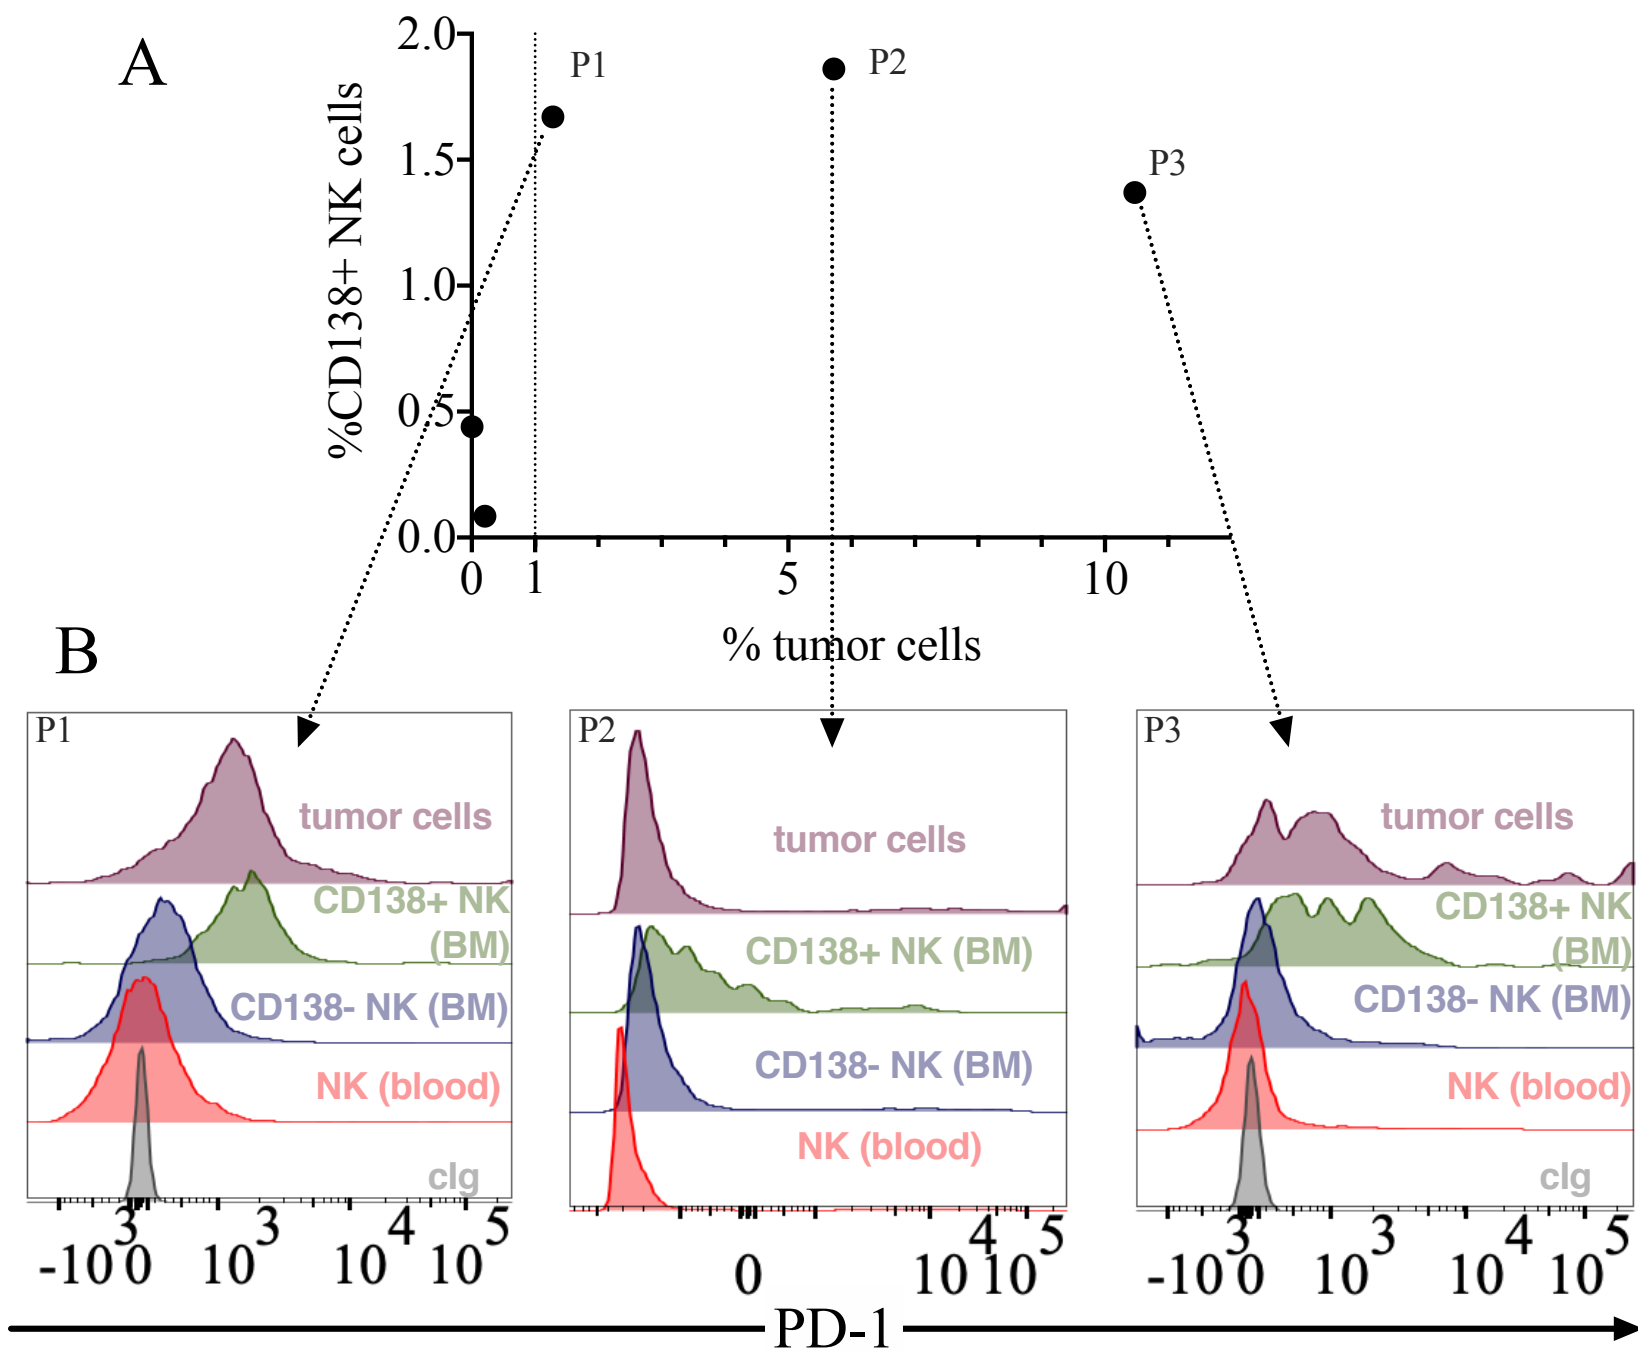

Figure 4

**Figure 4: NK cells labelled with MM markers also stain for PD-1.** (A) The presence of blasts was correlated with the frequency of CD138<sup>+</sup> NK cells in BM aspirates from MM patients. Tumor cells were gated as viable-CD45<sup>low</sup>CD138<sup>+</sup> events, NK cells were gated as viable-CD45<sup>+</sup>CD3<sup>+</sup>CD56<sup>+</sup> events. (B) PD-1 staining was analyzed by flow-cytometry in MM cells (purple), NK cells in the blood (red), or in the BM (CD138<sup>-</sup>, blue vs CD138<sup>+</sup>, green) of the patients showed in A.
